# Supplementary material
Source: PubMed Central journal article supplement (PMC8905546)
Supplement: NIHMS1781827-supplement-Suppl_Fig_1-2.pdf [file NIHMS1781827-supplement-Suppl_Fig_1-2.pdf]

Supplemental Figure 1

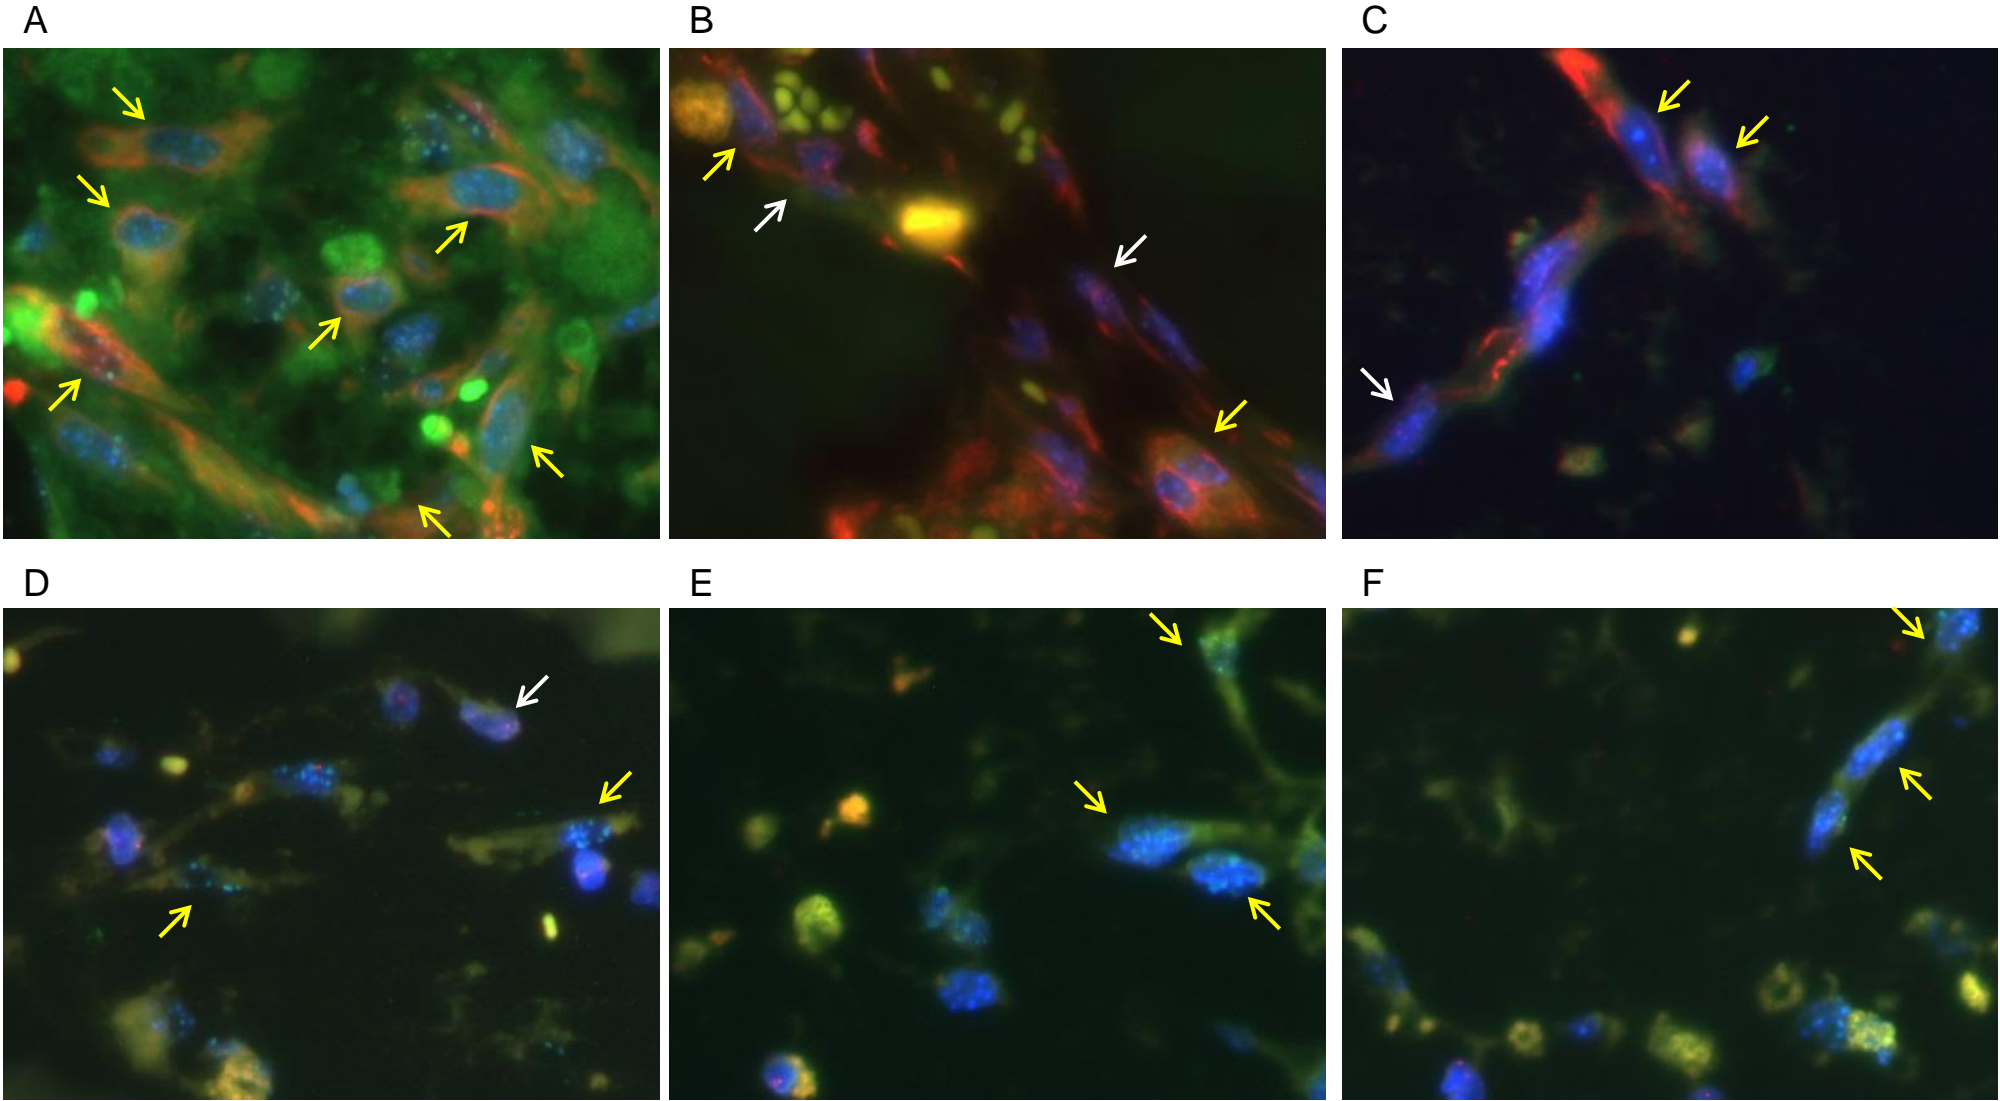

**Supplemental Figure 1. Identification of human and mouse fibroblast-like cells**

Femoral sections of NSG recipients engrafted with circulating PMF cells were labeled with anti-human X chromosome probe (red), anti-mouse pan-centromeric probe (green), anti-human CD45 antibody (A-C; green, D-F; red), and anti-vimentin antibody (A-C; red, D-F; green). Nuclei were stained with DAPI (blue). Both human fibroblast-like cells (white arrows) and mouse fibroblast-like cells (yellow arrows) were present in the fibrotic region of the recipient bone marrow.

Supplemental Figure 2

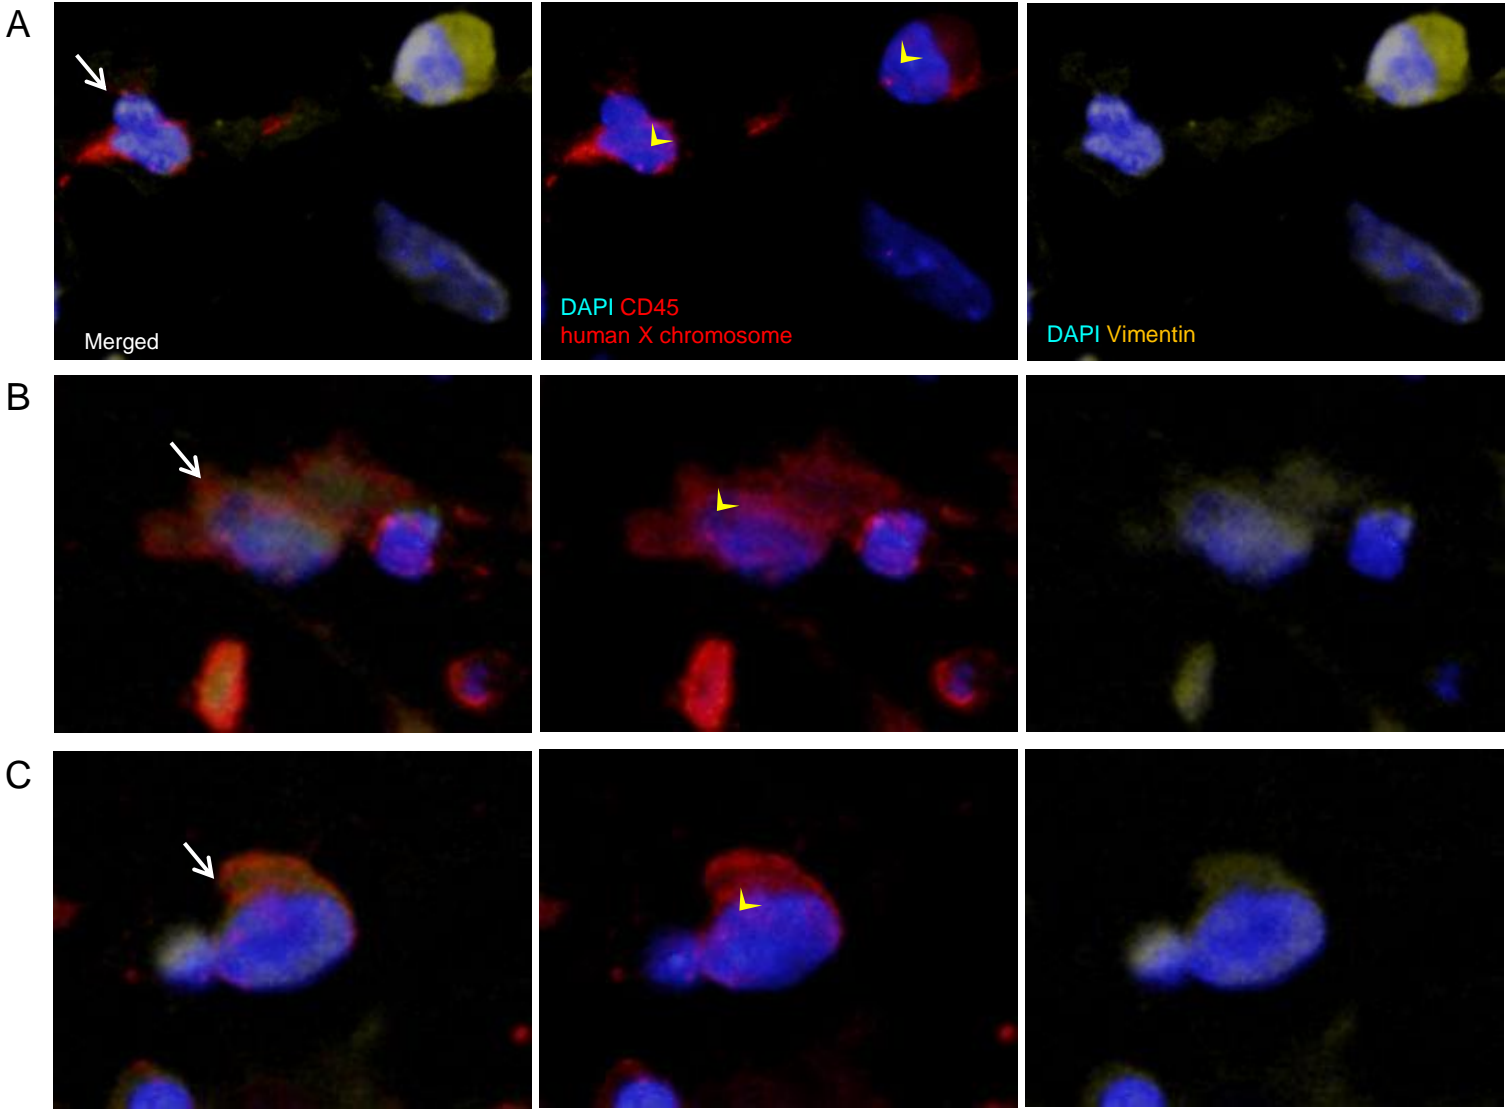

**Supplemental Figure 2. Identification of potential human fibrocytes**

We detected potential fibrocytes (white arrows) which were characterized by a spindle shape, anti-human X chromosome probe positive, vimentin+ and CD45+. Images for every staining (left), those with DAPI (blue) , human X chromosome probe and human CD45 (red) (center) and those with DAPI (blue) and vimentin (yellow) (right) are shown. Arrow heads represent FISH signals.
