# Supplementary material
Source: PubMed Central journal article supplement (PMC8905546)
Supplement: NIHMS1781827-supplement-Suppl_Table_1.pdf [file NIHMS1781827-supplement-Suppl_Table_1.pdf]

Supplemental Table 1. Patient characteristics

| UPN | Age/sex | PB leucocyte count (x10 <sup>9</sup> /L) | % PB blast | % PB CD34+ | PB Hemoglobin concentration (g/dL) | PB platelet count (x10 <sup>9</sup> /L) | LDH (U/L) | Splenomegaly | Myelofibrosis grading | Presence of MPN-associated mutations |         |     |
|-----|---------|------------------------------------------|------------|------------|------------------------------------|-----------------------------------------|-----------|--------------|-----------------------|--------------------------------------|---------|-----|
|     |         |                                          |            |            |                                    |                                         |           |              |                       | JAK2                                 | CALR    | MPL |
| 1   | 51 M    | 2.7                                      | 2.0        | 2.4        | 9.4                                | 28.0                                    | 879       | mild         | MF-3                  | NA                                   | NA      | NA  |
| 2   | 44 M    | 8.0                                      | 0.5        | 1.0        | 11.1                               | 253.0                                   | 1023      | severe       | MF-3                  | WT                                   | Mutated | WT  |
| 3   | 51 F    | 7.3                                      | 1.0        | 2.2        | 7.3                                | 138.0                                   | 528       | moderate     | MF-3                  | WT                                   | WT      | WT  |
| 4   | 70 M    | 9.2                                      | 2.0        | 4.9        | 8.2                                | 202.0                                   | 990       | mild         | MF-3                  | V617F                                | WT      | WT  |
